# Supplementary material for: Transcriptomic Reprogramming, Alternative Splicing and RNA Methylation in Potato (Solanum tuberosum L.) Plants in Response to Potato Virus Y Infection
Source: MDPI journal article supplement (doi:10.3390/plants11050635), 2022-02-25
Supplement: s1 [file s1]

**Table S12.** Primers used for quantitative RT PCR

| Primer                                     | 5'-3' sequence                                        | Reference             | Primer Concentration (nM) | E (%) |
|--------------------------------------------|-------------------------------------------------------|-----------------------|---------------------------|-------|
| PVY <sup>o</sup> -F<br>PVY <sup>o</sup> -R | TATGATGGATTTGGCGACCACTTGT<br>TAAACTAGGCAGCTCTGCATCATG | Makarova et al., 2018 | 400                       | 95.7  |
| StPARP1-F<br>StPARP1-R                     | GCCATGGAAAGCTGAGTATG<br>GCCACATCGGCATTAATCCATC        | Soltu.DM03G032200*    | 400                       | 95.4  |
| StPARG-F<br>StPARG-R                       | AGGAAGAAATTTCGATTTATGA<br>GAGGCATGCCTGGTATAACTCG      | Soltu.DM.12G003820*   | 350                       | 97.6  |
| StADPR-PPase -F<br>StADPR-PPase -R         | TATGATGACTTATTGGATTCC<br>CCATATGCCTGAAAGAGCCGACG      | Soltu.DM.08G000850*   | 400                       | 96.3  |
| StSPDS-F<br>StSPDS-R                       | GATGGTTATTGATGTTTCAAGG<br>TGACATCATATGTTCCCGGAGC      | Soltu.DM.06G014480*   | 400                       | 95.9  |
| StSAMDC-F<br>StSAMDC-R                     | GTTTCTGCCATCGGATTTGA<br>TTCATCCAATTGATCTTTGG          | Soltu.DM02G030190*    | 400                       | 96.3  |
| StCOX-F<br>StCOX-R                         | GGTCGGACATACCTGAAAC<br>CCAAAAGTATGAAAAGCTGGAG         | Baebler et al., 2011  | 350                       | 97.3  |
| StEF-1 $\alpha$ -F<br>StEF-1 $\alpha$ -R   | CTTGACGCTCTTGACCAGATT<br>GAAGACGGAGGGGTTTGTCT         | Nicot et al., 2005    | 350                       | 98.7  |

Full references are provided in the main text. Primer concentrations giving the lowest threshold cycle ( $C_t$ ) value were utilized in RT-PCR and are listed in the Table. E, efficiency of PCR amplification as calculated by CFX Manager Software.

\*Gene sequences were retrieved from Plant Genomics Resource Phytozome 12 (<https://phytozome.jgi.doe.gov/pz/portal.html>).
